# Supplementary material for: No population bias to left-hemisphere language in 4-year-olds with language impairment
Source: PeerJ journal article supplement (doi:10.7717/peerj.507), 2014-08-07

Supplementary figure for Bishop, D. V. M., Holt, G., Whitehouse, A. J. O., & Groen, M. No population bias to left-hemisphere language in 4-year-olds with language impairment.


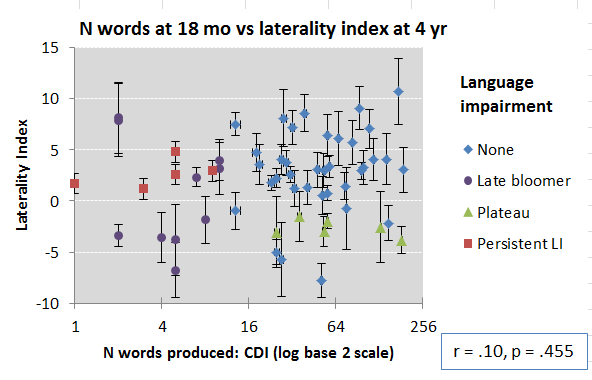

Supplement: Supplementary_figure_for_Bishop.docx [file Supplementary_figure_for_Bishop.docx]
